# Supplementary material for: Cost of preterm birth during initial hospitalization: A care provider’s perspective
Source: PLoS One. 2019 Jun 25;14(6):e0211997. doi: 10.1371/journal.pone.0211997 (PMC6592503; doi:10.1371/journal.pone.0211997)
Supplement: S1 Table — (XLSX) [file pone.0211997.s001.xlsx]

## Sheet: Provider cost patient dataset
	Intensive Care												Quantity			Total Overhead					Total	General	Total	Cost per	Total
									LOS	LOS			TPN	Mobile	Transfusion	TPN	Inpatient	Mobile	Blood	NICU and	Consumables	Overhead	Admission	patient	Overhead
	Patient ID	Hospital	Gender	Gender	Gestation	Gestation	BW	BW	(days)	(days)	Vent	Vent	orders	imaging		Pharmacy	Pharmacy	Imaging	Bank	Ward	Cost	Cost	Cost	day	Cost
1	AS9307	1	1	M	4	27	4	0.96	3	118	3	104	31	17	9	2418	708	408	84	40120	13763.8	16	57517.8	487.439	43754
2	AS9378	1	2	F	4	26	4	0.81	3	96	3	56	35	18	10	2730	576	432	112	32640	12628.6	16	49134.6	511.818	36506
3	AS6989	1	1	M	4	27	4	0.84	1	27	3	68	40	5	10	3120	162	120	112	9180	12735.8	16	25445.8	942.437	12710
4	AS9397	1	1	M	4	27	3	1.26	2	54	2	22	29	7	4	2262	324	168	56	18360	7561.24	16	28747.2	532.356	21186
5	AS1186	1	1	M	4	26	4	0.61	3	132	3	63	16	8	15	1248	792	192	140	44880	11712.2	16	58980.2	446.82	47268
6	AS7076	1	2	F	4	25	4	0.82	3	111	3	53	8	11	10	624	666	264	112	37740	9933.83	16	49355.8	444.647	39422
7	AS8099	1	2	F	4	27	4	0.88	3	97	3	38	29	6	4	2262	582	144	56	32980	8234.98	16	44275	456.443	36040
8	SP3616	2	2	F	4	27	4	0.79	3	72	3	37	22	15	5	1716	432	360	56	24480	7943.61	16	35003.6	486.161	27060
9	SP4946	2	2	F	4	27	3	1.16	3	80	3	55	24	16	5	1872	480	384	56	27200	10365.8	16	40373.8	504.673	30008
10	SP6487	2	1	M	4	27	3	1.07	2	55	3	34	26	9	2	2028	330	216	28	18700	7956.91	16	29274.9	532.271	21318
11	AS9584	1	2	F	3	31	3	1.22	2	56	2	3	6	0	2	468	336	0	28	19040	2437.73	16	22325.7	398.674	19888
12	AS9709	1	2	F	3	30	3	1.24	2	52	2	1	15	2	0	1170	312	48	0	17680	4118.24	16	23344.2	448.928	19226
13	AS0178	1	1	M	3	28	3	1.13	3	94	3	49	46	15	10	3588	564	360	112	31960	12628.4	16	49228.4	523.707	36600
14	AS0177	1	1	M	3	28	3	1.13	3	94	3	68	12	5	10	936	564	120	112	31960	10149.8	16	43857.8	466.572	33708
15	AS0181	1	2	F	3	30	3	1.05	3	85	3	33	21	3	0	1638	510	72	0	28900	5327.69	16	36463.7	428.985	31136
16	AS4169	1	2	F	3	31	3	1.03	3	62	2	7	15	5	2	1170	372	120	28	21080	5345.77	16	28131.8	453.738	22786
17	AS9224	1	2	F	3	29	3	1.24	2	51	2	9	24	3	0	1872	306	72	0	17340	6120.71	16	25726.7	504.445	19606
18	AS9542	1	1	M	3	31	3	1.35	2	41	2	25	56	3	3	4368	246	72	28	13940	13449.9	16	32119.9	783.413	18670
19	AS3213	1	1	M	3	30	3	1.34	2	47	2	12	18	6	0	1404	282	144	0	15980	6008.7	16	23834.7	507.121	17826
20	AS4263	1	1	M	3	31	1	2.25	1	19	2	2	0	4	0	0	114	96	0	6460	2478.8	16	9164.8	482.358	6686
21	AS5215	1	1	M	3	28	3	1.12	2	52	2	16	17	5	10	1326	312	120	112	17680	7015.59	16	26581.6	511.184	19566
22	AS5254	1	1	M	3	30	3	1.14	2	48	2	11	36	6	2	2808	288	144	28	16320	7397.28	16	27001.3	562.527	19604
23	AS5590	1	1	M	3	28	3	1.02	3	68	2	27	53	8	3	4134	408	192	28	23120	10024.9	16	37922.9	557.69	27898
24	AS5591	1	2	F	3	28	4	0.88	3	90	3	48	24	9	6	1872	540	216	56	30600	8759.36	16	42059.4	467.326	33300
25	AS5824	1	2	F	3	30	3	1.31	2	38	2	4	26	4	0	2028	228	96	0	12920	5203.93	16	20491.9	539.261	15288
26	AS7632	1	1	M	3	29	4	0.99	3	85	2	6	14	5	3	1092	510	120	28	28900	4546.34	16	35212.3	414.263	30666
27	AS9408	1	1	M	3	28	3	1.46	2	41	2	10	0	4	2	0	246	96	28	13940	3432.15	16	17758.2	433.126	14326
28	SP5685	2	2	F	3	31	3	1.28	2	33	2	1	24	2	0	1872	198	48	0	11220	3698.56	16	17052.6	516.744	13354
29	SP6492	2	1	M	3	28	4	0.975	2	59	3	43	16	9	1	1248	354	216	28	20060	7292.09	16	29214.1	495.154	21922
30	SP9126	2	2	F	3	28	3	1.065	2	56	2	21	9	7	0	702	336	168	0	19040	4942.08	16	25204.1	450.073	20262
31	SP0370	2	2	F	3	31	2	1.6	2	37	2	12	10	5	0	780	222	120	0	12580	4474.05	16	18192.1	491.677	13718
32	SP0514	2	2	F	3	31	2	1.7	1	22	2	16	0	5	0	0	132	120	0	7480	2996.33	16	10744.3	488.379	7748
33	SP0866	2	2	F	3	31	4	0.99	2	58	2	12	18	7	2	1404	348	168	28	19720	4930.63	16	26614.6	458.873	21684
34	SP1291	2	1	M	3	30	3	1.1	2	40	2	12	28	3	0	2184	240	72	0	13600	5385.52	16	21497.5	537.438	16112
35	SP1733	2	2	F	3	31	1	2.1	1	9	2	1	0	1	0	0	54	24	0	3060	513.138	16	3667.14	407.46	3154
36	SP3438	2	1	M	3	31	3	1.15	1	29	2	9	20	9	0	1560	174	216	0	9860	4993.07	16	16819.1	579.968	11826
37	SP4331	2	1	M	3	30	3	1.1	2	53	3	32	16	5	0	1248	318	120	0	18020	6024.14	16	25746.1	485.776	19722
38	SP6528	2	2	F	3	31	3	1.19	3	94	2	27	26	6	2	2028	564	144	28	31960	7371.3	16	42111.3	447.993	34740
39	SP7165	2	1	M	3	30	3	1.04	1	28	2	6	10	3	0	780	168	72	0	9520	2412	16	12968	463.143	10556
40	SP7465	2	2	F	3	30	3	1	3	65	3	30	22	12	3	1716	390	288	28	22100	6385	16	30923	475.738	24538
41	SP7464	2	2	F	3	30	3	1.31	3	65	2	21	0	16	2	0	390	384	28	22100	4939	16	27857	428.569	22918
42	SP7806	2	2	F	3	31	3	1.4	2	44	2	9	0	12	0	0	264	288	0	14960	3631	16	19159	435.432	15528
43	SP8112	2	2	F	3	31	3	1.43	2	35	2	2	0	4	0	0	210	96	0	11900	3228	16	15450	441.429	12222
44	SP8445	2	2	F	3	31	2	1.65	1	11	2	1	0	1	0	0	66	24	0	3740	3263	16	7109	646.273	3846
45	SP9211	2	1	M	3	30	4	0.885	2	53	2	3	16	4	3	1248	318	96	28	18020	4045	16	23771	448.509	19726
46	SP9266	2	2	F	3	31	3	1.33	2	33	2	1	0	1	0	0	198	24	0	11220	976	16	12434	376.788	11458
47	AS4182	1	1	M	2	32	1	2.73	1	9	2	1	0	2	0	0	54	48	0	3060	469.251	16	3631.25	403.472	3178
48	AS4367	1	2	F	2	32	2	1.6	1	26	2	1	0	1	0	0	156	24	0	8840	848.656	16	9884.66	380.179	9036
49	AS4964	1	2	F	2	32	2	1.6	2	31	2	4	21	2	0	1638	186	48	0	10540	4471.61	16	16899.6	545.149	12428
50	AS7430	1	1	M	2	33	4	0.99	3	167	3	43	105	21	20	8190	1002	504	196	56780	31961.2	16	98649.2	590.714	66688
51	AS8925	1	2	F	2	32	3	1.49	2	35	2	5	38	6	0	2964	210	144	0	11900	5291.08	16	20525.1	586.431	15234
52	AS0917	1	1	M	2	33	2	1.56	2	34	2	4	4	1	0	312	204	24	0	11560	2956.58	16	15072.6	443.311	12116
53	AS1067	1	2	F	2	32	3	1.28	2	40	2	12	16	4	0	1248	240	96	0	13600	4528.11	16	19728.1	493.203	15200
54	AS6868	1	1	M	2	33	2	1.78	2	32	2	10	2	7	0	156	192	168	0	10880	3398.92	16	14810.9	462.841	11412
55	AS7970	1	1	M	2	32	3	1.31	3	119	2	5	81	23	10	6318	714	552	112	40460	19917.3	16	68089.3	572.179	48172
56	SP5975	2	1	M	2	32	3	1.48	1	24	2	3	0	1	0	0	144	24	0	8160	939.581	16	9283.58	386.816	8344
57	SP7998	2	2	F	2	33	3	1.46	1	26	2	1	0	1	0	0	156	24	0	8840	763.796	16	9799.8	376.915	9036
58	SP8976	2	1	M	2	32	3	1.35	2	42	2	13	13	6	0	1014	252	144	0	14280	5767.85	16	21473.8	511.282	15706
59	SP1365	2	1	M	2	33	1	2.2	1	9	2	1	0	2	0	0	54	48	0	3060	568.581	16	3746.58	416.287	3178
60	SP2672	2	2	F	2	32	3	1.14	2	43	2	13	20	6	1	1560	258	144	28	14620	4827	16	21453	498.907	16626
61	SP3091	2	2	F	2	32	2	1.68	1	12	2	1	0	1	0	0	72	24	0	4080	296	16	4488	374	4192
62	SP2829	2	2	F	2	33	2	1.82	1	17	2	2	0	1	0	0	102	24	0	5780	546	16	6468	380.471	5922
63	SP3493	2	2	F	2	33	1	2.05	1	10	2	4	0	3	0	0	60	72	0	3400	904.642	16	4452.64	445.264	3548
64	SP3614	2	2	F	2	32	3	1.3	1	25	2	1	0	1	0	0	150	24	0	8500	814	16	9504	380.16	8690
65	SP4626	2	2	F	2	33	1	2.08	1	16	2	7	0	8	0	0	96	192	0	5440	2740	16	8484	530.25	5744
66	SP4354	2	2	F	2	33	1	2.02	1	10	2	4	0	2	0	0	60	48	0	3400	2375.51	16	5899.51	589.951	3524
67	SP5483	2	1	M	2	33	2	1.695	1	16	2	1	0	3	0	0	96	72	0	5440	2110	16	7734	483.375	5624
68	SP6065	2	2	F	2	32	2	1.99	1	17	2	3	0	4	0	0	102	96	0	5780	4608	16	10602	623.647	5994
69	SP6761	2	2	F	2	32	2	1.95	1	7	2	1	0	1	0	0	42	24	0	2380	200	16	2662	380.286	2462
70	SP7236	2	2	F	2	33	2	1.9	1	17	2	2	0	2	0	0	102	48	0	5780	550	16	6496	382.118	5946
71	AS8376	1	2	F	1	35	2	1.69	2	29	2	1	0	6	0	0	174	144	0	9860	1381.58	16	11575.6	399.158	10194
72	AS6602	1	1	M	1	35	1	2.32	1	13	2	4	0	1	0	0	78	24	0	4420	2676.11	16	7214.11	554.932	4538
73	SP7577	2	2	F	1	34	4	0.81	3	104	2	20	35	12	2	2730	624	288	28	35360	8536.26	16	47582.3	457.522	39046
74	SP1453	2	1	M	1	34	1	2.15	1	9	1	0	0	6	0	0	54	144	0	3060	680.707	16	3954.71	439.412	3274
75	SP1603	2	1	M	1	36	1	2.63	1	2	1	0	0	1	0	0	12	24	0	680	103.578	16	835.578	417.789	732
76	SP1628	2	1	M	1	34	1	2.49	1	16	2	5	0	3	0	0	96	72	0	5440	768.636	16	6392.64	399.54	5624
77	SP1987	2	2	F	1	34	1	2.25	1	8	2	1	0	1	0	0	48	24	0	2720	390	16	3198	399.75	2808
78	SP2693	2	2	F	1	36	1	2.55	2	36	1	0	0	5	0	0	216	120	0	12240	1600.63	16	14192.6	394.24	12592
79	SP3103	2	1	M	1	34	2	1.85	1	18	2	8	8	16	0	624	108	384	0	6120	9546.75	16	16798.8	933.264	7252
80	SP3840	2	1	M	1	34	1	2.7	1	11	2	7	0	3	0	0	66	72	0	3740	2489	16	6383	580.273	3894
81	SP3605	2	2	F	1	36	1	2.69	1	27	2	17	5	9	2	390	162	216	28	9180	5973.96	16	15966	591.332	9992
82	SP3729	2	2	F	1	34	1	2.35	2	35	1	0	0	2	0	0	210	48	0	11900	252	16	12426	355.029	12174
83	SP4813	2	1	M	1	34	1	2.36	1	5	2	1	0	1	0	0	30	24	0	1700	160	16	1930	386	1770
84	SP6331	2	1	M	1	34	1	2.1	1	6	2	2	0	2	0	0	36	48	0	2040	274	16	2414	402.333	2140
85	SP6332	2	1	M	1	34	2	1.8	1	7	2	1	0	1	0	0	42	24	0	2380	321	16	2783	397.571	2462
86	SP6455	2	2	F	1	34	1	2	1	16	2	7	0	2	0	0	96	48	0	5440	719.94	16	6319.94	394.996	5600
87	SP6456	2	2	F	1	34	2	1.62	1	15	2	1	0	1	0	0	90	24	0	5100	450	16	5680	378.667	5230
88	SP6586	2	2	F	1	34	1	2.08	1	6	2	1	0	2	0	0	36	48	0	2040	311	16	2451	408.5	2140
89	SP7186	2	1	M	1	34	1	2.25	1	4	2	2	0	1	0	0	24	24	0	1360	214	16	1638	409.5	1424
90	SP8415	2	1	M	1	34	1	2.14	1	6	2	1	0	2	0	0	36	48	0	2040	334	16	2474	412.333	2140
91	SP8966	2	1	M	1	34	2	1.57	1	19	2	2	0	1	0	0	114	24	0	6460	390	16	7004	368.632	6614
92	SP9108	2	2	F	1	34	1	2.19	1	9	2	3	0	1	0	0	54	24	0	3060	565	16	3719	413.222	3154
93	SP9175	2	1	M	1	34	3	1.15	2	32	2	1	8	1	0	624	192	24	0	10880	1854	16	13590	424.688	11736
	Minimal Care												Quantity			Total Overhead					Total	General	Total	Cost per	Total
									LOS	LOS			TPN	Mobile	Transfusion	TPN	Inpatient	Mobile	Blood	NICU and	Consumables	Overhead	Admission	patient	Overhead
	Patient ID	Hospital	Gender	Gender	Gestation	Gestation	BW	BW	(days)	(days)	Vent	Vent	orders	imaging		Pharmacy	Pharmacy	Imaging	Bank	Ward	Cost	Cost	Cost	day	Cost
94	SP2231	2	2	F	1	36	1	2.8	1	1	1	0	0	0	0	0	6	0	0	340	69	16	431	431	362
95	SP2015	2	1	M	1	36	1	2.1	1	4	1	0	0	0	0	0	24	0	0	1360	114	16	1514	378.5	1400
96	SP2964	2	2	F	1	36	2	1.95	1	2	1	0	0	0	0	0	12	0	0	680	197	16	905	452.5	708
97	SP2845	2	1	M	1	34	1	2.74	1	5	1	0	0	2	0	0	30	48	0	1700	241	16	2035	407	1794
98	SP4656	2	2	F	1	35	1	2.29	1	1	1	0	0	0	0	0	6	0	0	340	12	16	374	374	362
99	SP4934	2	1	M	1	36	2	1.76	1	7	1	0	0	0	0	0	42	0	0	2380	159	16	2597	371	2438
100	SP5827	2	2	F	2	32	2	1.56	1	22	1	0	0	0	0	0	132	0	0	7480	593	16	8221	373.682	7628
101	SP5918	2	2	F	1	35	1	2.1	1	3	1	0	0	0	0	0	18	0	0	1020	162	16	1216	405.333	1054
102	SP3489	2	1	M	1	34	2	1.72	1	8	1	0	0	0	0	0	48	0	0	2720	196	16	2980	372.5	2784
103	SP6849	2	1	M	1	34	2	1.61	1	16	1	0	0	0	0	0	96	0	0	5440	492	16	6044	377.75	5552
104	AS6393	1	1	M	1	34	1	2.7	1	1	1	0	0	0	0	0	6	0	0	340	172	16	534	534	362
105	AS7330	1	2	F	1	34	1	2.54	1	5	1	0	0	0	0	0	30	0	0	1700	285	16	2031	406.2	1746
106	AS7624	1	2	F	1	34	1	2.21	1	6	1	0	0	1	0	0	36	24	0	2040	254	16	2370	395	2116
107	AS8101	1	2	F	1	35	2	1.88	1	1	1	0	0	0	0	0	6	0	0	340	20	16	382	382	362
108	AS8102	1	2	F	1	35	3	1.44	1	19	1	0	0	0	0	0	114	0	0	6460	306	16	6896	362.947	6590
109	AS9482	1	2	F	2	33	1	2.01	1	4	1	0	0	1	0	0	24	24	0	1360	219	16	1643	410.75	1424
110	AS9640	1	2	F	1	34	2	1.56	1	27	1	0	0	2	0	0	162	48	0	9180	733	16	10139	375.519	9406
111	AS9303	1	1	M	1	35	1	2	1	2	1	0	0	0	0	0	12	0	0	680	177	16	885	442.5	708
112	ASLP09	1	2	F	1	35	1	2.2	1	3	1	0	0	0	0	0	18	0	0	1020	124	16	1178	392.667	1054
